RESEARCH ARTICLE

# Recurrent polyploidy and descending dysploidy as plant genome shapers: Insights from *Sporobolus* (Chloridoideae, Poaceae) genomes

Morgane Milin<sup>1</sup>, Oscar Lima<sup>1</sup>, Lin-Feng Li<sup>2</sup>, Bo Li<sup>3,4</sup>, Marc Beringer<sup>5</sup>, Christian Parisod<sup>5</sup>, Malika Ainouche<sup>1</sup>, Armel Salmon<sup>1\*</sup>

**1** UMR CNRS 6553 ECOBIO, University of Rennes, Campus de Beaulieu, Rennes Cedex, France, **2** State Key Laboratory of Biocontrol, Guangdong Provincial Key Laboratory of Plant Resources, School of Life Sciences, Sun Yat-sen University, Guangzhou, China, **3** State Key Laboratory of Wetland Conservation and Restoration, National Observations and Research Station for Wetland Ecosystems of the Yangtze Estuary, Ministry of Education Key Laboratory for Biodiversity Science and Ecological Engineering, Institute of Eco-Chongming, School of Life Sciences, Fudan University, Shanghai, China, **4** State Key Laboratory for Vegetation Structure, Functions and Construction, Ministry of Education Key Laboratory for Transboundary Ecoscience of Southwest China, Yunnan Key Laboratory of Plant Reproductive Adaptation and Evolutionary Ecology, Institute of Biodiversity, School of Ecology and Environmental Science and the Southwest United Graduate School, Yunnan University, Kunming, China, **5** Department of Biology, University of Fribourg, Fribourg, Switzerland

\* [armel.salmon@univ-rennes.fr](mailto:armel.salmon@univ-rennes.fr)

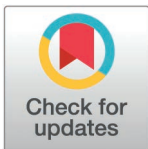

**OPEN ACCESS**

**Citation:** Milin M, Lima O, Li L-F, Li B, Beringer M, Parisod C, et al. (2026) Recurrent polyploidy and descending dysploidy as plant genome shapers: Insights from *Sporobolus* (Chloridoideae, Poaceae) genomes. PLoS One 21(2): e0343073. <https://doi.org/10.1371/journal.pone.0343073>

**Editor:** Lewis Lukens, University of Guelph, CANADA

**Received:** July 9, 2025

**Accepted:** January 30, 2026

**Published:** February 23, 2026

**Copyright:** © 2026 Milin et al. This is an open access article distributed under the terms of the [Creative Commons Attribution License](https://creativecommons.org/licenses/by/4.0/), which permits unrestricted use, distribution, and reproduction in any medium, provided the original author and source are credited.

**Data availability statement:** sequencing reads of *S. maritimus* are available in the European Nucleotide Archive database under accession PRJEB73506. Genome assembly and annotation of *S. maritimus* are available at Figshare <https://figshare.com/projects/>

## Abstract

Polyploidization or whole genome duplication (WGD) is a source of genetic and phenotypic novelties and is a widespread mechanism of speciation across plant lineages. It is often followed by complex genome dynamics, including diploidization. Recurrent polyploidization leads to overlapping genomic processes complicating efforts to reconstruct genome histories in extant species. Here, we focused on the complex and understudied Chloridoideae subfamily of grasses, where polyploidy is recurrent and base chromosome number variation particularly common. We explored the evolutionary history of *Sporobolus* genomes through comparative genomics analyses, including species from sections *Sporobolus* and *Spartina* and selected representatives of different grass lineages. We used the WGD\_Tracker pipeline to identify homologous genes and estimate their divergence, as well as to detect syntenic regions, and reconstruct karyotypes. We found that sections *Sporobolus* and *Spartina* diverged 13.2–26.0 million years ago (Mya), based on molecular clock analyses, and showed that the two WGD events detected in section *Spartina* (*S. maritimus* and *S. alterniflorus*) occurred independently of another WGD in section *Sporobolus* (*S. stapfianus* and *S. pyramidalis*). We also identified five nested chromosome insertions (NCI), a major descending dysploidy mechanism that resulted in a new base chromosome number ( $n = 15$ ) in section *Spartina* sub-section *alterniflori*. The ancestral grass chromosome 12 appears particularly prone to structural modifications – such as insertions and rearrangements – throughout

[Sporobolus maritimus genome annotation/235733](#). *S. alterniflorus* data are available in the National Genomics Data Center database under accession PRJCA016449.

**Funding:** This work was conducted in the framework of a collaborative project (Interuniversity Convention) between the University of Rennes (France) and the Fudan University of Shanghai (China). The French contributors gratefully acknowledge funding from UMR 6553 Ecology, Biodiversity and Evolution (Ecobio - University of Rennes - CNRS), including a doctoral grant to M. Milin by the University of Rennes. Additional support was received from the CNRS – University of Rennes – funded International Research Network (IRN) Polyploidy and Biodiversity (POLYDIV). The Chinese team was supported by the National Key Research and Development Program of China and the National Natural Science Foundation of China. The authors acknowledge two reviewers for their contribution. The funders had no role in study design, data collection and analysis, decision to publish, or preparation of the manuscript.

**Competing interests:** The authors have declared that no competing interests exist.

Chloridoideae evolution. Both ancestral chromosomes 11 and 12 were involved in a recent rearrangement that contributed to chromosome number divergence during speciation between *S. alterniflorus* ( $2n=62$ ) and *S. maritimus* ( $2n=60$ ), estimated at 3.7–7.7 Mya. Comparative analyses of Chloridoideae genomes provide new insights into genome duplication histories and post-polyploidization genome restructuring through descending dysploidy and revealed that NCIs are a prevalent diploidization mechanism, offering new perspectives to explore the genomic innovations underpinning the success of allo-polyploids.

## Introduction

Plant genome dynamics is shaped by recurring cycles of polyploidization and diploidization processes, as widely documented across angiosperms [1,2]. Polyploidization or whole genome duplication (WGD) results in the presence of more than two chromosome sets in the nucleus. It has long been recognized as a major evolutionary process in plants, leading to the formation of new species [3–5].

Diploidization is the process that returns a polyploid genome to a diploid-like state by restoring bivalent pairing and disomic inheritance [6]. Diploidization is driven by a variety of cytological and genetic mechanisms [6], such as gene fractionation (i.e., duplicated gene loss) [7–9], descending dysploidy (i.e., chromosome number reduction) [10], or genome downsizing (i.e., genome size reduction) [11–13]. Superimposed WGD events dating back to ancestors of various plant lineages were documented, and extant diploid species are now considered to be diploidized paleo-polyploids [14,15]. Consequently, much attention has been paid to the formation pathways of polyploids, and to the immediate genetic, phenotypic, and ecological consequences of polyploidy [16–21]. However, much remains to be understood regarding the frequency and nature of these phenomena across the various plant lineages, especially in non-model taxa.

The Poaceae family is an excellent model for investigating polyploid genome evolution. It is one of the most polyploid-rich plant families (~80% of species) [22,23], shaped by an ancient shared WGD event (*rho*,  $\approx 90$ –115 million years ago) [24,25], as well as several more recent lineage-specific WGDs [8,26] that have contributed to its adaptive diversification and evolutionary success [27].

Subfamilies of Poaceae containing key crop species are particularly well studied in terms of genome evolution. For example, the rice genome (*Oryza sativa*, Oryzoideae,  $2n=2x=24$ ), which has not experienced any WGD since the *rho* event, serves as a reference for grass comparative genomics due to its highly conserved ancestral genome structure [24, 28]. In the Panicoideae subfamily, chromosome fusions led to a reduction in basic chromosome number from 12 to 10, as observed in the genomes of *Sorghum bicolor* ( $2n=2x=20$ ) [29] and *Zea mays*. The latter experienced a WGD 5–12 million years ago (Mya) [30,31], followed by chromosome fusions and transposable elements proliferation, shaping a diploidized meso-tetraploid ( $2n=2x=20$ ) modern genome [32]. In *Saccharum*

*spontaneum* ( $2n=40-128$ ), chromosome rearrangements led to new basic chromosome numbers of  $x=8$  and  $x=9$ , followed by additional polyploidization events [33].

In the Pooideae subfamily, genome duplication and chromosome rearrangements have been well-documented, most particularly in the Triticeae tribe [34]. Nested chromosome insertions (NCI) were reported as the main mechanism involved in descending dysploidy in this tribe, and involved in a chromosome number reduction from 12 to 7 [35]. Various WGDs have been identified in different lineages, such as in the allo-hexaploid wheat (*Triticum aestivum*, AABBDD,  $2n=6x=42$ ) that resulted from two successive allo-polyploidization events  $<0.8$  and  $<0.4$  Mya, respectively [36].

Despite extensive work in Oryzoideae, Panicoideae, and Pooideae, Chloridoideae remain underexplored. This subfamily includes 1,603 described species distributed in 121 genera and five tribes (Centropodieae P.M. Peterson, Triraphideae P.M. Peterson, Eragrostideae Stapf., Zoysieae Benth. and Cynodonteae Dumort.; [37]), and exhibits highly variable basic chromosome numbers ( $x=6, 7, 8, 9, 10$ ) [38] and ploidy levels ranging from  $2x$  to  $20x$  [39]. Chromosome scale assemblies were recently reported in Eragrostideae (*Eragrostis curvula* [40]; *E. tef* [41]), Cynodonteae (*Cynodon dactylon* [42]; *C. transvaalensis* [43]; *Eleusine coracana* [44]; *Oropetium thomaeum* [45]) and Zoysieae (*Zoysia japonica* [46]; *Sporobolus alterniflorus* [47]; *S. maritimus* [48]) tribes. Two chromosomal fusion events were reported as ancestral in Chloridoideae, resulting in a chromosome number reduction from 12 to 10 [42,44,46].

In this study, we focus on the large and taxonomically complex *Sporobolus* genus for which chromosome number and ploidy level information are still lacking for many species. Four genomes are sequenced to date: *S. stapfianus* and *S. pyramidalis* in section *Sporobolus* [49], *S. alterniflorus* [47] and *S. maritimus* [48] in section *Spartina*. Phylogenetic analyses revealed the paraphyletic nature of the former *Sporobolus* genus and proposed the inclusion of the former *Calamovilfa* and *Spartina* genera (where they are now considered as sections) [50].

The sect. *Spartina* represents a monophyletic clade that diversified within the last 10 million years [51]. This section represents a model in evolutionary ecology with several foundation species in saltmarsh ecosystems [52]. *S. alterniflorus* and *S. maritimus* are considered as “ecosystem engineers” on salt marshes [53,54]. Section *Spartina* is a model system in plant speciation research, with a textbook example of neo-polyploidy, following the hybridization between *Sporobolus alterniflorus* ( $2n=62$ ) and *Sporobolus maritimus* ( $2n=60$ ) during the 19<sup>th</sup> century which resulted in the formation of the highly invasive allo-polyploid, *Sporobolus anglicus* ( $2n=124$ ) [55]. As the basic chromosome number in this group was traditionally considered to be  $x=10$  [56], *S. maritimus* and *S. alterniflorus* were considered hexaploid, and their descendant *S. anglicus* as allo-dodecaploid [57]. The allo-polyploid nature of the parental species was hypothesised according to the propensity of interspecific hybridization in the sect. *Spartina* and to the detected presence of divergent duplicated genes in both *S. maritimus* and *S. alterniflorus* [58,59]. However, recent whole genome analyses of the parental species [48] revealed that both genomes have been shaped by two successive WGDs: the first event dating back to 9.6–24.4 Mya (WGD1) led to a tetraploid genome with  $2n=4x=40$  which was followed by a basic chromosome number reduction from  $n=20$  and  $x=10$  to  $n=x=15$ . The second event dating back to 2.1–6.2 Mya (WGD2) led to  $n=30$ , with two sets of 15 homeologous subgenomes. *S. maritimus* and *S. alterniflorus* then appear to be tetraploids that diverged following a chromosomal rearrangement in the *S. alterniflorus* ancestor [48]. According to the estimated divergence times of these events, WGD1 occurred before the emergence of the section *Spartina* species.

In this paper, we explore the evolutionary history of *Sporobolus* genomes, focusing on the evolution of chromosomal structure. The following questions are addressed: (i) What is the structure of available *Sporobolus* genomes compared to the ancestral Poaceae genome? (ii) Are WGD events reported to date in *Sporobolus* shared with other Chloridoideae genomes? (iii) What are the mechanisms responsible for basic chromosome number changes?

To address these questions, we conducted comparative genome analyses involving *Sporobolus* species from sections *Sporobolus* and *Spartina*, along with representative species from key Poaceae lineages (e.g., Oryzoideae, Pooideae, Panicoideae, Chloridoideae; Fig 1).

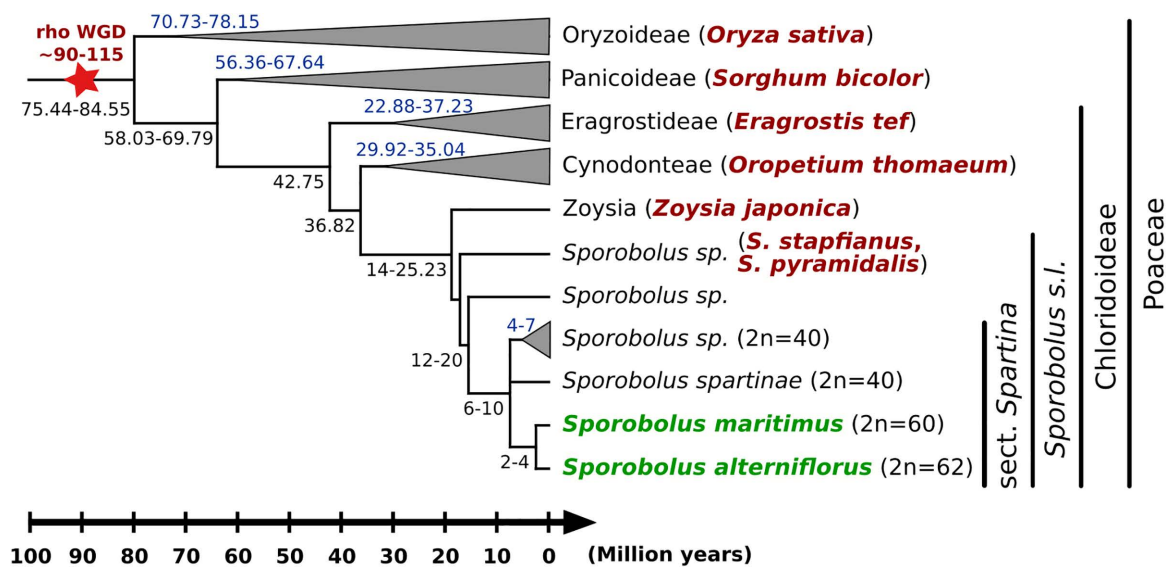

**Fig 1. Phylogenetic relationships among grass species (highlighted in red), compared to *Sporobolus maritimus* and *S. alterniflorus* (in green), as analyzed in this study.** Divergence times are derived from [51,60], while estimates of the *rho* whole genome duplication (WGD) are from [24,25].

<https://doi.org/10.1371/journal.pone.0343073.g001>

## Materials and methods

### Selected set of Poaceae species for comparative genomics

We compared the recently sequenced genome of *Sporobolus maritimus* (2n = 4x = 60; Chloridoideae, Zoysieae, *Sporobolus* sect. *Spartina*) [48] and *Sporobolus alterniflorus* (2n = 4x = 62) [47] with a curated panel of grass genomes selected on the basis of phylogenetic proximity and genome assembly quality (Fig 1; S1 Table). The panel included: the two closest phylogenetic relatives, *Sporobolus stapfianus* (4x) and *Sporobolus pyramidalis* (6x) (Chloridoideae, Zoysieae, *Sporobolus* sect. *Sporobolus*; v2) [49], *Zoysia japonica* (2n = 4x = 40; Chloridoideae, Zoysieae; version r1.1) [61], *Oropetium thomaeum* (2n = 2x = 20; Chloridoideae, Cynodonteae; v2.1) [45], *Eragrostis tef* (2n = 4x = 40; Chloridoideae, Eragrostideae; v3) [41], *Sorghum bicolor* (2n = 2x = 10; Panicoideae; v3.1) [62], and *Oryza sativa* (2n = 2x = 24; Oryzoideae; v7) [63]. *O. sativa*, *S. bicolor* and *O. thomaeum* did not undergo further WGD since the *rho* paleo-duplication and therefore represent excellent models for understanding the evolution of the ancestral Poaceae genome.

### Detection of homologous and putative orthologous regions

Orthologous protein sequences across the selected Poaceae genomes were identified using OrthoFinder2 (v2.5.2) [64] with default parameters. We also included *Setaria italica* [65] and *Brachypodium distachyon* [66], representing more divergent Poaceae lineages, to improve orthogroup inference by increasing phylogenetic signal and facilitating the identification of conserved orthologs. Because of high gene duplication rates in plants – particularly in polyploids – Reciprocal Best Blast Hit (RBBH) may under-detect homologous genes [67]. To mitigate this, we applied a more permissive Reciprocal Blast Hits (RBH) approach using BLASTn (BLAST, v2.9.0) [68] on CDS sequences with the following thresholds: e-value < 1e-5, identity ≥ 70%, alignment length ≥ 60 bp, and removal of CDSs with > 25% repetitive content. This RBH-based approach, implemented using the WGD\_Tracker RBBH pipeline [69] (S1 Fig), maximized homolog detection between the sect. *Spartina* genomes (*S. maritimus*, *S. alterniflorus*) and seven Poaceae genomes.

## Divergence between homologous genes

Homologous gene pairs were aligned with MACSE (v2.05) [70,71], using default parameters. Synonymous substitution rates (Ks) were estimated using the Nei and Gojobori model [72] implemented in *codeml* (PAML v4.9) [73]. To reduce noise from misalignments or saturation, Ks values below 0.01 (highly similar copies) and  $\geq 3$  (saturated divergence) were filtered out before subsequent analyses. Ks distributions were modeled using expectation-maximization fitting of Gaussian mixtures via the *normalmixEM()* function in the *mixtools* R package (v1.2.0) [74], with a convergence criterion set to 0.001 and 1,000 bootstrap iterations. All steps, from alignment to Ks modeling, are incorporated into WGD\_Tracker's Ks pipeline [69] (S1 Fig). Divergence times (T) were computed as:  $T = \frac{Ks}{2 \times (6.5 \times 10^{-9})}$ , assuming a monocot-specific synonymous substitution rate of  $6.5 \times 10^{-9}$  substitutions/site/year [75]. This substitution rate was selected as it represents the commonly used reference of Monocots substitution rate and is widely applied in grasses [76–80].

## Synteny search

To identify conserved syntenic blocks, we applied the WGD\_Tracker's synteny search pipeline [69] (S1 Fig), integrating filtered RBH pairs and their corresponding Ks values. Genes with multiple homologous copies on the same chromosome and Ks values outside the range  $0.01 \leq Ks < 3$  were excluded. Syntenic blocks were defined as segments containing  $\geq 5$  orthologous gene pairs with no more than 100 intervening genes. This flexible criterion allowed detection of WGD-related blocks while minimizing false positives from local duplications. To assess the robustness of this parameter choice, synteny analyses were also performed using more stringent gap thresholds, and the results are presented in S2 Fig.

The JCVI tool [81] was used to generate a graphical representation of syntenic blocks between the *O. sativa*, *O. thomaeum* and *S. maritimus* karyotypes. Synteny between *S. alterniflorus* chromosomes and *S. maritimus* scaffolds allowed us to reconstruct “pseudochromosomes” in *S. maritimus*. The *S. maritimus* “pseudochromosomes” were numbered the same way as *S. alterniflorus* chromosomes.

## Karyotype reconstruction

Ancestral origin of *S. maritimus* genes was inferred from synteny across five genomes (*O. sativa*, *S. bicolor*, *E. tef*, *O. thomaeum*, and *Z. japonica*). A total of 12 ancestral chromosomes were defined using the *O. sativa* genome as the primary reference (Table 1). For each comparative hit, the chromosomal location in the compared species was translated into one or more putative ancestral chromosomes using the chromosome homology table (Table 1, columns 1–6). This procedure resulted, for each *Sporobolus* sect. *Spartina* gene, in a list of possible ancestral origins.

Empirical probabilities for each ancestral origin were calculated by summing alignment scores (bitscores) supporting that origin and by normalizing with the total bitscore across all comparative hits for a given gene. Bootstrap replicates (n = 1000) were then generated by resampling ancestral origin labels with replacement according to these empirical probabilities.

The ancestral origin with the highest bootstrap support was considered the most likely one. An origin was retained as the unique assignment for a gene if its bootstrap support – the proportion of bootstrap replicates in which it was the majority – was at least 0.5 and exceeded the support of the next most probable origin by at least 0.05. If no origin clearly met these criteria, multiple origins with similar support were retained, and the gene was considered to have an ambiguous ancestral assignment.

Homologous gene blocks were cross-validated through synteny analysis between *S. maritimus* and *S. alterniflorus*, using a maximum intergene gap of 20 genes. Validated blocks were required to share a consistent ancestral identity across all comparisons. When a gene pair exhibited multiple equally supported ancestral origins, the final assignment was resolved by comparison with the dominant ancestral origin of neighboring syntenic pairs within the block. If the dominant block-level origin was among the potential origins of the ambiguous gene pair, this origin was assigned. In contrast, when

**Table 1.** Homology detected by RBH and dot-plot comparisons between chromosomes of *Oryza sativa*, *Sorghum bicolor*, *Eragrostis tef*, *Oropetium thomaeum*, *Zoysia japonica*, *Sporobolus alterniflorus* and scaffolds of *Sporobolus maritimus*. The columns labeled “Copy 1” to “Copy 4” are used to distinguish the four copies forming a chromosome composed from one or several scaffolds of *S. maritimus*. Ancestral grass chromosomes are represented in the first column [29,82]. Fig 4 illustrates the chromosomal homologies and rearrangements shown in this table, with a color code based on the 12 ancestral grass chromosomes.

| Ancestral Grass Chromosomes | <i>Oryza sativa</i> | <i>Sorghum bicolor</i> | <i>Eragrostis tef</i> | <i>Oropetium thomaeum</i> | <i>Zoysia japonica</i> | <i>Sporobolus alterniflorus</i> | <i>Sporobolus maritimus</i> |                |        |                    |
|-----------------------------|---------------------|------------------------|-----------------------|---------------------------|------------------------|---------------------------------|-----------------------------|----------------|--------|--------------------|
|                             |                     |                        |                       |                           |                        |                                 | Copy 1                      | Copy 2         | Copy 3 | Copy 4             |
| A1                          | 1                   | 3                      | 3A, 3B                | 3                         | 5, 6                   | 2, 5, 3, 8                      | 3                           | 16, 21         | 9      | 15, 45, 50         |
| A2                          | 2                   | 4, 1                   | 1A, 1B                | 1                         | 7, 8                   | 9, 13, 6, 15                    | 1                           | 2              | 7      | 12, 26             |
| A3                          | 3                   | 1                      | 4A, 4B                | 4                         | 1, 2                   | 4, 7, 1, 12                     | 4, 56                       | 60, 43, 18     | 20, 22 | 64, 14, 19         |
| A4                          | 4                   | 6                      | 7A, 7B                | 6                         | 11, 12                 | 23, 26, 25, 30                  | 51, 44, 37                  | 47, 57, 59, 46 | 53, 29 | 52, 24             |
| A5                          | 5                   | 9                      | 9A, 9B                | 5                         | 17, 18                 | 1, 12, 18, 22                   | 4                           | 43, 40, 49     | 10     | 23, 39             |
| A6                          | 6                   | 2, 10                  | 2A, 2B                | 2                         | 19, 20                 | 14, 21, 10, 11                  | 8                           | 36, 25         | 5      | 41, 30, 62, 38, 54 |
| A7                          | 7                   | 2                      | 5A, 5B                | 7                         | 3, 4                   | 19, 27, 24, 28                  | 48, 17, 63                  | 27, 55, 42     | 32, 35 | 34, 28             |
| A8                          | 8                   | 7                      | 8A, 8B                | 9                         | 13, 14                 | 16, 17, 20, 29                  | 6                           | 11, 61         | 13     | 66, 33, 31         |
| A9                          | 9                   | 2, 10                  | 2A, 2B                | 2                         | 19, 20                 | 14, 21, 10, 11                  | 8                           | 36, 25         | 5      | 41, 30, 62, 38, 54 |
| A10                         | 10                  | 4, 1                   | 1A, 1B                | 1                         | 7, 8                   | 9, 13, 6, 15, 4                 | 1                           | 2              | 7      | 12, 26             |
| A11                         | 11                  | 5                      | 6A, 6B                | 8                         | 9, 10                  | 16, 17, 7, 31                   | 6                           | 11             | 20, 22 | 14, 19             |
| A12                         | 12                  | 8                      | 10A, 10B              | 10                        | 15, 16                 | 19, 27, 6, 4                    | 48, 17                      | 27, 55, 42     | 7      | 12, 26             |

<https://doi.org/10.1371/journal.pone.0343073.t001>

a high proportion of genes within a genomic region displayed ambiguous ancestral origins, the syntenic block was terminated. Such regions were considered as transition zones, potentially reflecting chromosomal rearrangements that obscure reliable inference of a single ancestral origin.

The entire karyotype reconstruction process, as described above, is incorporated within WGD\_Tracker Karyotype pipeline [69] (S1 Fig).

## Results

Comparative genomic analyses included seven species from major Poaceae lineages, diverging at varying evolutionary timescales from *Sporobolus* sections *Sporobolus* and *Spartina* (Fig 1; S1 Table). Orthologous conserved genomic blocks were inferred through a combination of homology searches, divergence estimations and synteny analysis. *Sporobolus* sect. *Spartina* karyotypes were then reconstructed following synteny detection, using ancestral chromosome assignments inferred for each gene.

### Detection of homologous regions

OrthoFinder2 was used to identify 42,707 orthogroups across the selected genomes. Of these, 15,671 contained at least one homologous protein sequence from each of the following: *Sporobolus maritimus*, *S. alterniflorus*, a close relative within Zoysieae (*Zoysia japonica*, *S. stapfianus*, or *S. pyramidalis*), a more divergent Chloridoideae (*Eragrostis tef* or *Oropetium thomaeum*), a Panicoideae (*Sorghum bicolor* or *Setaria italica*), and a BOP clade species (*Brachypodium distachyon* or *Oryza sativa*) (S3 Fig).

### Estimation of synonymous divergence (Ks) among homologous genes

Intraspecific Ks analyses revealed a shared peak across grass species with Ks values ranging from 0.775 to 1.046, corresponding to the well-established *rho* WGD event in Poaceae, dated between 38.0 and 107.5 Mya (Fig. 2A; Table 2). Species such as *E. tef*, *Z. japonica*, and members of the *Sporobolus* genus (*S. stapfianus*, *S. pyramidalis*, *S. maritimus*, and *S. alterniflorus*) exhibited additional Ks peaks that correspond to recent WGD events (Fig 2A; Table 2).

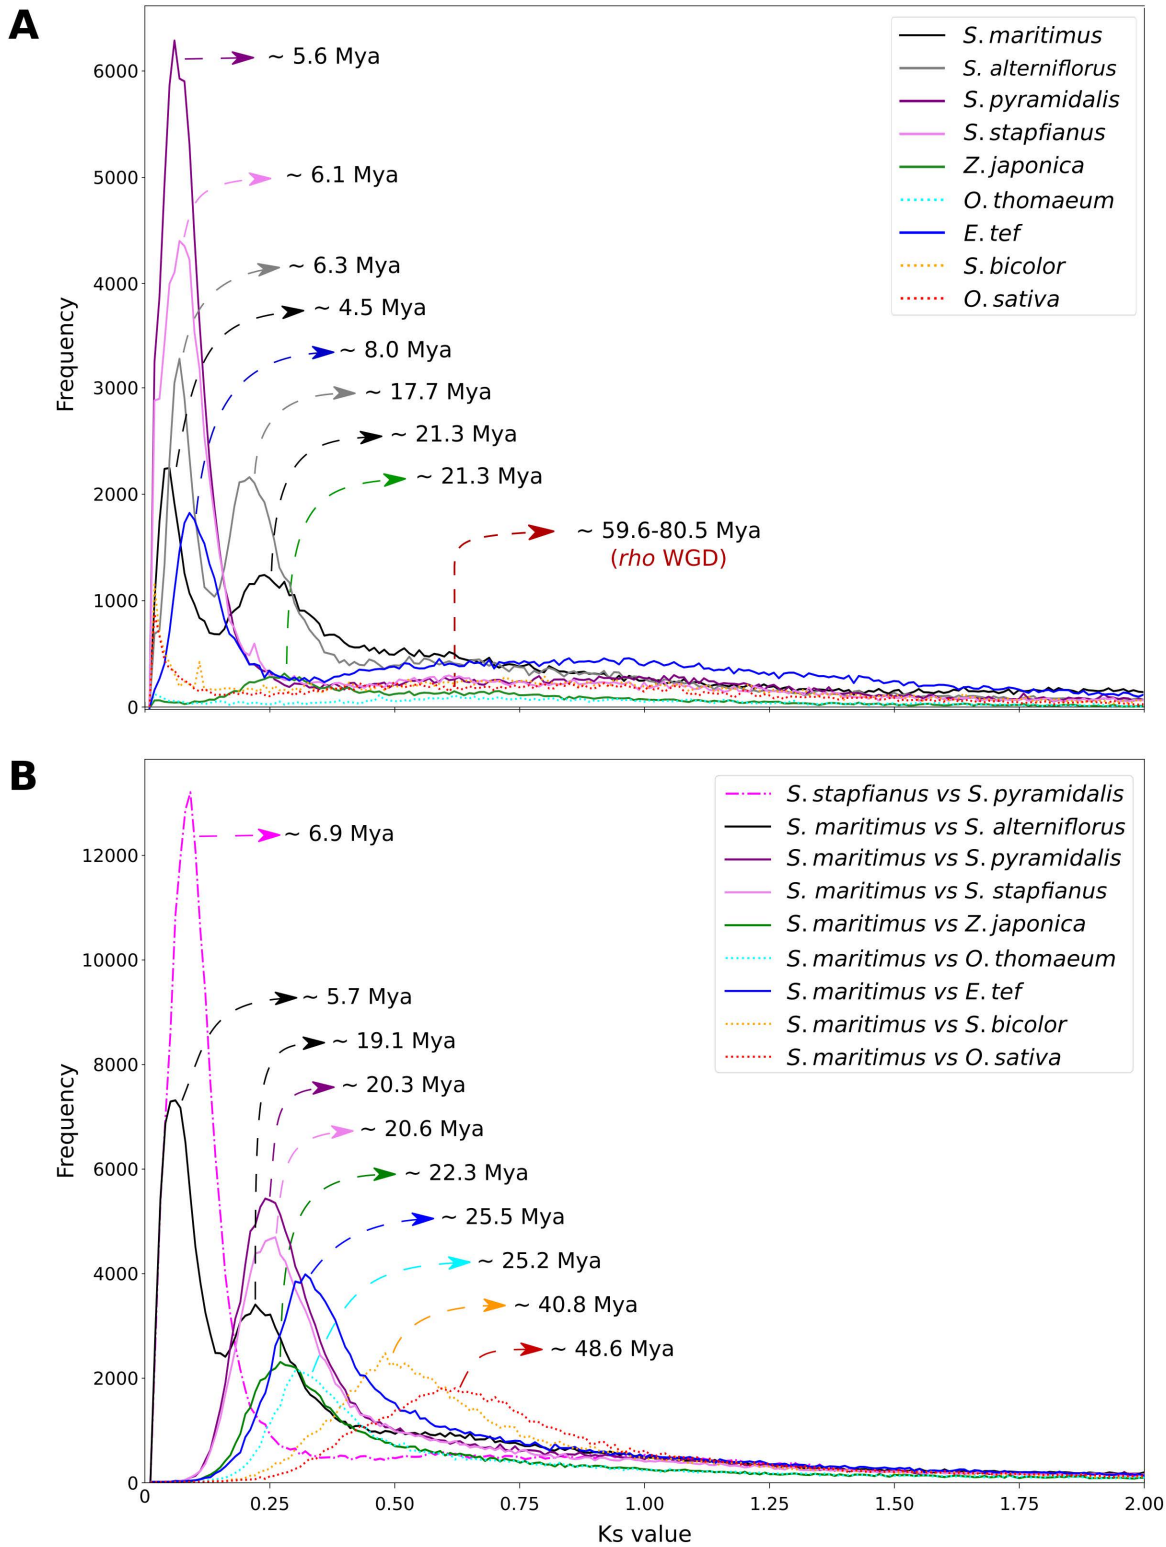

**Fig 2. Distribution of synonymous substitution rates (Ks).** (A) intragenomic comparisons within selected Poaceae genomes, and (B) intergenomic comparisons between *S. maritimus* and the other Poaceae genomes. Divergence times corresponding to each Ks peak were estimated using the mix-tools R package and are displayed for both datasets.

<https://doi.org/10.1371/journal.pone.0343073.g002>

**Table 2. Intra- and inter-specific Ks values and divergence time estimations. The Nei and Gojobori model [72] was used to estimate synonymous substitution rates (Ks). Divergence times were estimated using  $6.5 \times 10^{-9}$  substitutions per site per year [75]. The *rho* WGD refers to the Poaceae ancient polyploidization; WGD indicates more recent, lineage-specific duplication events; WGD1 and WGD2 correspond to the two successive WGD events identified in the section *Spartina*.**

| Comparisons                                      |                | Ks    |        | Divergence time (Mya) |      |       |
|--------------------------------------------------|----------------|-------|--------|-----------------------|------|-------|
|                                                  |                | mode  | stdevs | min                   | mode | max   |
| Intraspecific                                    |                |       |        |                       |      |       |
| <i>O. sativa</i>                                 | <i>rho</i> WGD | 0.914 | 0.335  | 44.5                  | 70.3 | 96.1  |
| <i>S. bicolor</i>                                | <i>rho</i> WGD | 0.971 | 0.343  | 48.3                  | 74.7 | 101.1 |
| <i>E. tef</i>                                    | WGD            | 0.104 | 0.044  | 4.6                   | 8.0  | 11.4  |
|                                                  | <i>rho</i> WGD | 1.006 | 0.345  | 50.8                  | 77.4 | 103.9 |
| <i>O. thomaeum</i>                               | <i>rho</i> WGD | 1.011 | 0.309  | 54.0                  | 77.8 | 101.5 |
| <i>Z. japonica</i>                               | WGD            | 0.277 | 0.106  | 13.2                  | 21.3 | 29.5  |
|                                                  | <i>rho</i> WGD | 0.884 | 0.272  | 47.1                  | 68.0 | 88.9  |
| <i>S. stapfianus</i>                             | WGD            | 0.080 | 0.042  | 2.9                   | 6.1  | 9.4   |
|                                                  | <i>rho</i> WGD | 1.037 | 0.326  | 54.7                  | 79.7 | 104.8 |
| <i>S. pyramidalis</i>                            | WGD            | 0.072 | 0.039  | 2.6                   | 5.6  | 8.6   |
|                                                  | <i>rho</i> WGD | 1.046 | 0.352  | 53.4                  | 80.5 | 107.5 |
| <i>S. maritimus</i>                              | WGD2           | 0.058 | 0.022  | 2.8                   | 4.5  | 6.2   |
|                                                  | WGD1           | 0.277 | 0.100  | 13.7                  | 21.3 | 29.0  |
|                                                  | <i>rho</i> WGD | 0.879 | 0.279  | 46.2                  | 67.6 | 89.1  |
| <i>S. alterniflorus</i>                          | WGD2           | 0.082 | 0.024  | 4.4                   | 6.3  | 8.1   |
|                                                  | WGD1           | 0.230 | 0.066  | 12.6                  | 17.7 | 22.7  |
|                                                  | <i>rho</i> WGD | 0.775 | 0.281  | 38.0                  | 59.6 | 81.2  |
| Interspecific                                    |                |       |        |                       |      |       |
| <i>S. maritimus</i> vs <i>O. sativa</i>          |                | 0.632 | 0.154  | 36.8                  | 48.6 | 60.5  |
| <i>S. alterniflorus</i> vs <i>O. sativa</i>      |                | 0.613 | 0.144  | 36.1                  | 47.2 | 58.2  |
| <i>S. maritimus</i> vs <i>S. bicolor</i>         |                | 0.530 | 0.123  | 31.3                  | 40.8 | 50.2  |
| <i>S. alterniflorus</i> vs <i>S. bicolor</i>     |                | 0.498 | 0.107  | 30.1                  | 38.3 | 46.6  |
| <i>S. maritimus</i> vs <i>E. tef</i>             |                | 0.332 | 0.080  | 19.3                  | 25.5 | 31.7  |
| <i>S. alterniflorus</i> vs <i>E. tef</i>         |                | 0.309 | 0.069  | 18.5                  | 23.8 | 29.1  |
| <i>S. maritimus</i> vs <i>O. thomaeum</i>        |                | 0.327 | 0.073  | 19.6                  | 25.2 | 30.8  |
| <i>S. alterniflorus</i> vs <i>O. thomaeum</i>    |                | 0.306 | 0.063  | 18.7                  | 23.5 | 28.4  |
| <i>S. maritimus</i> vs <i>Z. japonica</i>        |                | 0.291 | 0.073  | 16.7                  | 22.3 | 28.0  |
| <i>S. alterniflorus</i> vs <i>Z. japonica</i>    |                | 0.266 | 0.067  | 15.3                  | 20.5 | 25.6  |
| <i>S. maritimus</i> vs <i>S. stapfianus</i>      |                | 0.267 | 0.071  | 15.1                  | 20.6 | 26.0  |
| <i>S. alterniflorus</i> vs <i>S. stapfianus</i>  |                | 0.236 | 0.065  | 13.2                  | 18.2 | 23.2  |
| <i>S. maritimus</i> vs <i>S. pyramidalis</i>     |                | 0.263 | 0.070  | 14.9                  | 20.3 | 25.6  |
| <i>S. alterniflorus</i> vs <i>S. pyramidalis</i> |                | 0.234 | 0.062  | 13.2                  | 18.0 | 22.8  |
| <i>S. maritimus</i> vs <i>S. alterniflorus</i>   |                | 0.074 | 0.026  | 3.7                   | 5.7  | 7.7   |
|                                                  |                | 0.248 | 0.086  | 12.4                  | 19.1 | 25.7  |
| <i>S. stapfianus</i> vs <i>S. pyramidalis</i>    |                | 0.090 | 0.044  | 3.5                   | 6.9  | 10.3  |

<https://doi.org/10.1371/journal.pone.0343073.t002>

Interspecific Ks analyses between *Sporobolus* sect. *Spartina* genomes and all Poaceae representatives – from the rice to the *Sporobolus* sect. *Sporobolus* genomes – revealed single, distinct Ks peak, reflecting interlineage divergence events (Fig. 2B; S4 Fig; Table 2). The comparison between *S. stapfianus* and *S. pyramidalis* produced a Ks peak of  $\approx 0.09$ , corresponding to a divergence window of 3.5–10.3 Mya, suggesting recent speciation within the *Sporobolus* lineage (Fig 2B; Table 2).

Intraspecific Ks distributions revealed bimodal peaks in *S. maritimus* (2.8–6.2 and 13.7–29.0 Mya) and *S. alterniflorus* (4.4–8.1 and 12.6–22.7 Mya), which likely correspond to two independent rounds of WGD within the section *Spartina*. Comparative Ks analysis between *S. maritimus* and *S. alterniflorus* estimated their divergence time between 3.7 and 7.7 Mya.

### Synteny search

Comparative synteny analyses revealed a 1:4 chromosomal correspondence between diploid genomes (e.g., *O. sativa*, *S. bicolor*, and *O. thomaeum*) and those of *S. maritimus* and *S. alterniflorus*, consistent with two successive lineage-specific WGD events in sect. *Spartina* (Fig 3A; S5 Fig A and B; Table 1). Comparisons between tetraploid genomes (e.g., *E. tef* and *Z. japonica*) and the sect. *Spartina* showed a 2:4 ratio, whereas the comparison between *S. maritimus* and *S. alterniflorus* displayed a 4:4 ratio.

Several *S. maritimus* scaffolds exhibit homology and synteny with more than one chromosome of the Poaceae species compared (Table 1). For instance, scaffold 3 is fully syntenic with the rice chromosome 1, while it is only partially syntenic with the rice chromosome 6 (Fig 3A and *S. maritimus* pseudochromosome 2 in Fig 3D). Furthermore, rice chromosomes 2 and 10 are completely syntenic with *S. maritimus* scaffold 1 (Fig 3A and *S. maritimus* pseudochromosome 9 in Fig 3D). Similar observations were made in the *S. alterniflorus* genome (S5 Fig). These observations result from chromosomal rearrangements, including one translocation and seven fusion events that occurred during the evolutionary history of the *S. maritimus* and *S. alterniflorus* genomes (Fig 3; S5 Fig). Two of these events are shared with all the Chloridoideae genomes used in our comparisons, while the others are specific to *S. maritimus* and *S. alterniflorus* genomes.

### Karyotype evolution

Building on the ancestral karyotype model of  $n = 5$  [29,82], followed by a WGD and chromosomal rearrangements that produced the  $n = 12$  Poaceae ancestor, we reconstructed the karyotypic evolution of *S. maritimus* and *S. alterniflorus* (Fig 4, sections 1–5). The search for synteny between the two *Sporobolus* sect. *Spartina* genomes resulted in 96,990 pairs of homologous and syntenic genes corresponding to 2,631 syntenic blocks with only one ancestral origin per block. From this information and dotplot comparisons, we deduced the genome history of both *S. maritimus* and *S. alterniflorus* by locating the different chromosomal rearrangement events in the evolutionary history of the *Sporobolus* sect. *Spartina* genomes. We observed two independent fusion events specific to Chloridoideae, leading to a genome with  $x = 10$  (Fig 4, section 2). One event involved the integration of chromosome A10 between the arms of A2 (A2-A10-A2), whereas the other consisted of the insertion of A9 into A6 (A6-A9-A6). Then, the *Sporobolus* sect. *Spartina* ancestor underwent a first WGD, resulting in  $n = 20$  (Fig 4, section 3). Subsequently, five fusion events: A2-A10-A12-A10-A2; A7-A12-A7; A3-A5-A3; A3-A11-A3; A8-A11-A8; and one translocation between the distal regions of A6-9 and A1, led to a genome with  $n = 15$  (Fig 4, section 4). The second WGD event occurred in this genome, resulting in the modern *S. maritimus* genome with  $n = 30$ . The chromosomal rearrangement at the origin of the extra chromosomes pair in *S. alterniflorus* involves genomic regions homologous to the Poaceae ancestral chromosomes 11 and 12 (Fig 4, section 5).

### Discussion

This study reconstructs the evolutionary history of polyploid *Sporobolus* sect. *Spartina* genomes by tracing chromosomal rearrangements shaped by successive rounds of WGD and diploidization. Through comparative genomic analyses across representative Poaceae species, we distinguished shared from lineage-specific WGD events, and identified mechanisms of base chromosome number reduction.

We developed customizable pipelines dedicated to genomic comparisons allowing first, the identification of duplicated genes through homology and synteny searches, and second, to estimate the divergence between these duplicated genes

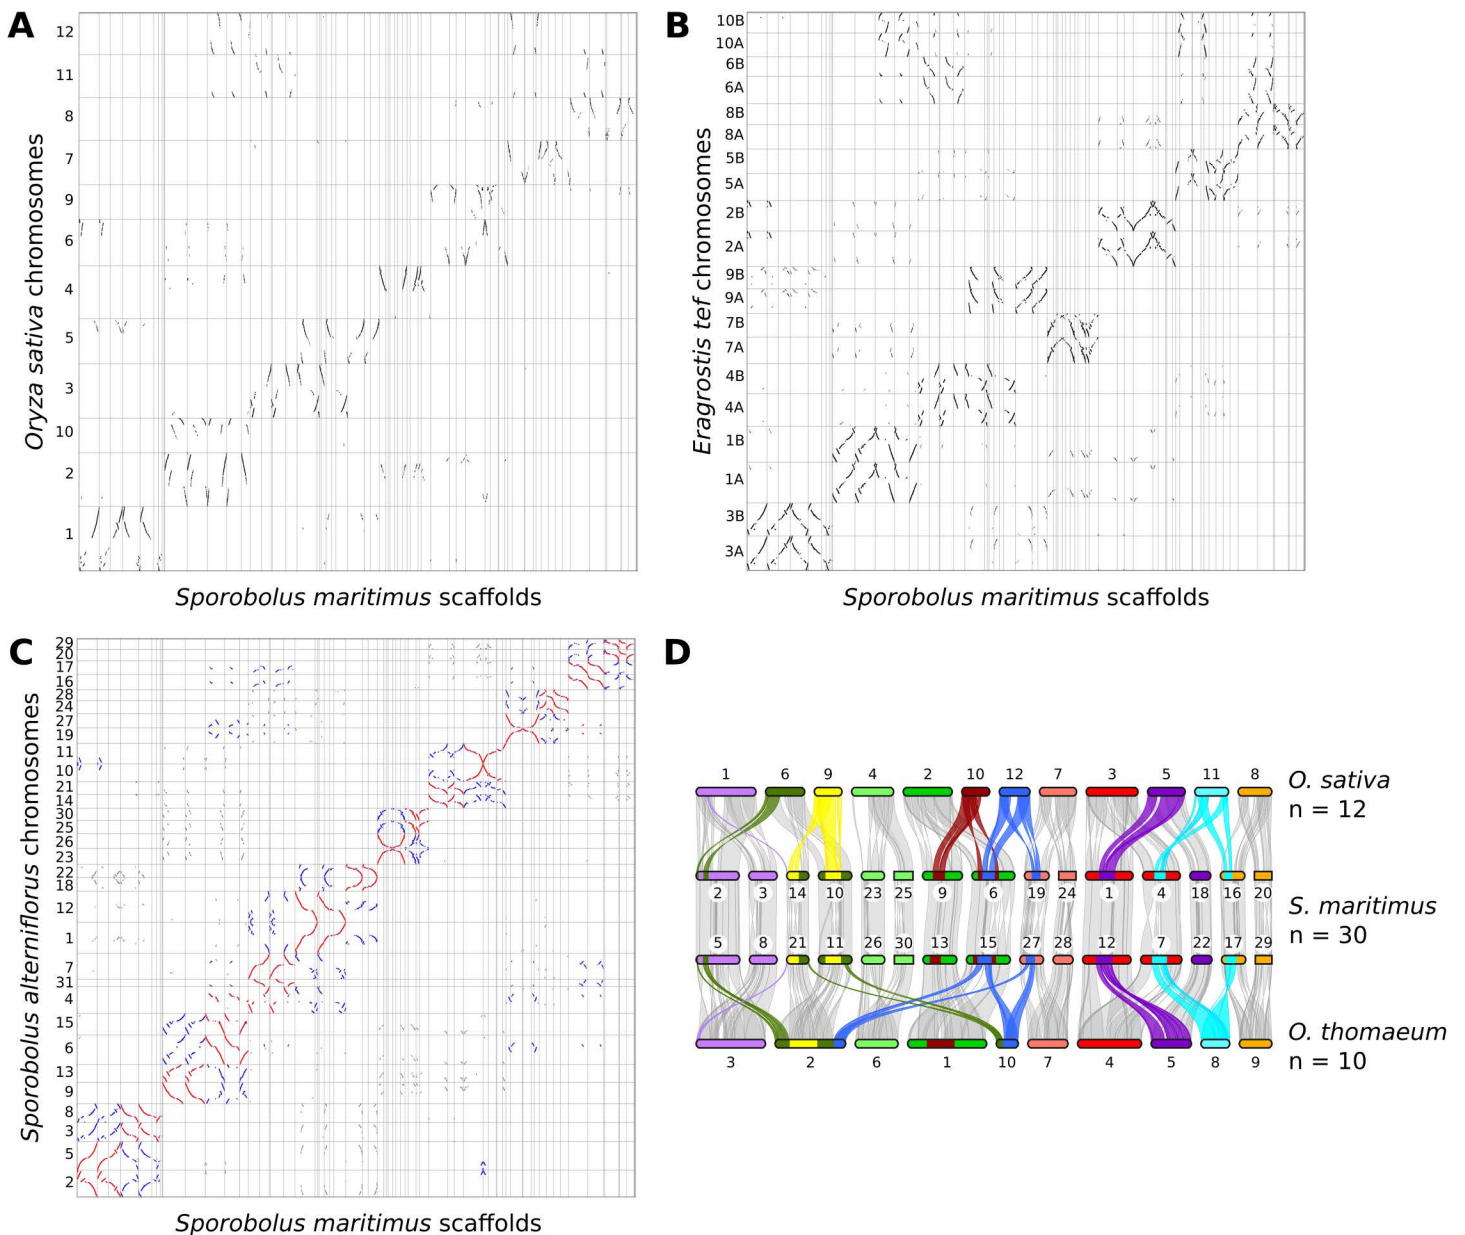

**Fig 3. Graphical representation of homologous genes and conserved syntenic blocks.** (A) Dotplot comparison between *Sporobolus maritimus* and *Oryza sativa* (N=19,232); black dots indicate Ks values between 0.478–0.786, all others in grey. (B) Dotplot comparison between *S. maritimus* and *Eragrostis tef* (N=58,411); black dots: Ks=0.252–0.412, others in grey. (C) Dotplot comparison between *Sporobolus maritimus* and *Sporobolus alterniflorus* (N=101,194); red (Ks=0.048–0.100), purple (Ks=0.100–0.162), blue (Ks=0.162–334), others in grey. (D) Linear syntenic map of homologous blocks resulting from WGD2 within *S. maritimus* “pseudochromosomes”, compared with orthologous regions from *O. sativa* and *Oropetium thomaeum*. Note: *S. maritimus* scaffold ordering in dotplots follows the order provided in S2 Fig legend for reproducibility.

<https://doi.org/10.1371/journal.pone.0343073.g003>

and finally to reconstruct the karyotypes. Among investigated species, if the *rho* WGD appears as the only shared WGD event, we report here a shared WGD in *S. stapfianus* and *S. pyramidalis* genomes, and identified five NCIs between the two ancestral WGDs which formed *S. maritimus* and *S. alterniflorus* genomes, leading to their new basic number by descending dysploidy.

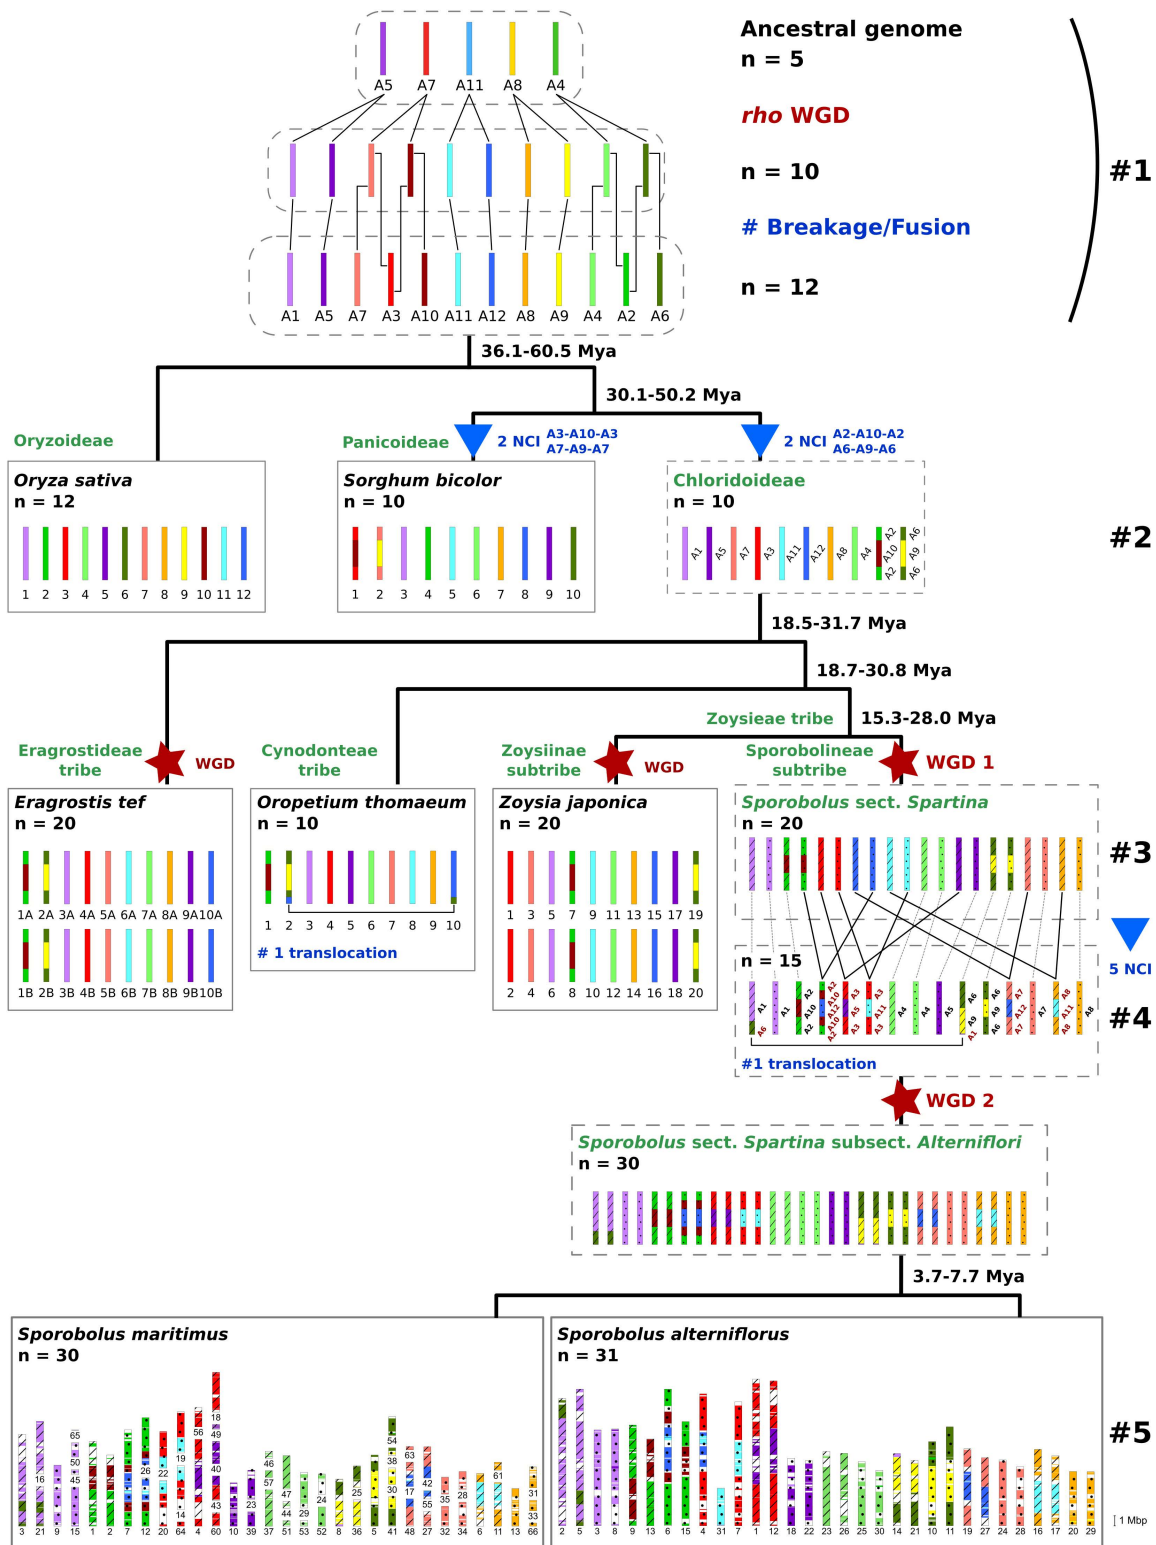

**Fig 4. Evolution of the ancestral grass genome with a focus on the Chloridoideae subfamily and the *Sporobolus* section *Spartina*.** A 12-color code was used to trace the chromosomal segments inherited from the ancestral Poaceae genome (n = 12) [29]. WGD=Whole Genome Duplication; NCI=Nested Chromosome Insertion. Colored dots and dashed lines denote homeologous chromosomes derived from WGD1 in *Sporobolus sect. Spartina*.

<https://doi.org/10.1371/journal.pone.0343073.g004>

## WGD events among Chloridoideae

Shared and independent WGD events among the different species were analyzed, and divergence times between subgenomes were estimated. In polyploids, divergence times estimated between duplicated subgenomes may reflect the divergence between the parental species (in allo-polyploids) and/or the transition from polysomic (expected in auto-polyploids) to disomic inheritance [83]. Therefore, the estimated divergence time represents the upper age limit of the genome duplication events. Our analyzes are consistent with WGDs reported in previous studies, including the *rho* paleo-duplication shared by all Poaceae species [24,77], as well as the more recent allo-polyploidization events of *Eragrostis tef* [41] and *Zoysia japonica* [84] genomes.

In the *Sporobolus* sect. *Sporobolus*, we evaluated subgenome divergence time as  $\approx 2.9$ – $9.4$  Mya in *S. stapfianus* and  $\approx 2.6$ – $8.6$  Mya in *S. pyramidalis*. Our comparison between these two genomes revealed a single Ks peak, indicating a shared WGD event and an estimated divergence time between the two species to be around 3.5–10.3 Mya. However, *S. stapfianus* and *S. pyramidalis* are polyploid complexes considered as tetraploid and hexaploid species, respectively [49]. The reasons for the lack of an additional Ks peak in the hexaploid *S. pyramidalis* are still unclear. One possible hypothesis is the scenario of successive WGDs that may result in overlapping Ks peaks suggesting that both *Sporobolus* species formed within a short evolutionary time. Further genomic comparisons at the chromosome level would improve the detection of WGD, and assess divergence between duplicated chromosomes in *S. pyramidalis*.

Distributions of Ks values between homeologous gene pairs of the *Sporobolus* sect. *Spartina* genomes exhibited two additional peaks since the *rho* WGD. These polyploidization events are estimated to have occurred around 13.7–29.0 (WGD1) and 2.8–6.2 (WGD2) Mya, in *S. maritimus*, and 12.6–22.7 (WGD1) and 4.4–8.1 (WGD2) Mya, in *S. alterniflorus*. These estimates are similar to those previously reported for both *S. maritimus* and *S. alterniflorus* (9.6–24.4 and 2.1–6.2) [48].

Divergence times between *Sporobolus* sect. *Spartina* genomes and the selected grasses revealed a Ks peak of  $\approx 0.61$ – $0.63$  and  $0.50$ – $0.53$  between the section *Spartina* and the rice and the sorghum genomes, respectively. These values are consistent with those reported in previous studies comparing Chloridoideae genomes to (i) the rice genome: 0.58 [40], 0.64 [84]; and (ii) the sorghum genome: 0.42 [40]. The single Ks peaks in interspecific comparisons imply that observed WGDs are species-specific, and provide the first clues for independent WGDs in the section *Spartina*.

Comparisons between the section *Spartina* and the other Chloridoideae tribes estimated divergence times with the genomes of *E. tef* and *O. thomaeum* as 18.5–31.7 and 18.7–30.8 Mya, respectively. Divergence time estimates align with prior studies, such as the 23–44 Mya separation between Eragrostideae and Zoysieae [85] and the  $\sim 26$ – $35$  Mya divergence between Zoysieae and Cynodonteae [51,86]. However, Gallaher and colleagues [60] estimated slightly higher divergence times with  $\approx 42.75$  (Zoysieae vs Eragrostideae) and  $\approx 36.82$  Mya (Zoysieae vs Cynodonteae).

The Zoysieae Benth. tribe diversified into two subtribes: Sporobolineae (e.g., *Sporobolus* sp.) and Zoysiinae (e.g., *Zoysia japonica*). We estimated the divergence time between these two subtribes to have occurred  $\approx 15.3$ – $28.0$  Mya which is consistent with the previous estimation of 14–25.23 Mya [60]. Within the Sporobolineae subtribe, we found that divergence between *Sporobolus* and *Spartina* sections occurred  $\approx 13.2$ – $26.0$  Mya, in agreement with the estimates of  $\approx 7$ – $22$  Mya [85]. Our analysis showed that no recent WGD events are shared between these two *Sporobolus* sections. The sect. *Sporobolus* is phylogenetically more distant from sect. *Spartina* than all the other sections of the *Sporobolus* genus: sect. *Fimbriatae*, sect. *Crypsis*, sect. *Triachyrum*, sect. *Virginicae*, sect. *Pyramidati*, sect. *Airoids*, sect. *Cryptandri*, sect. *Clandestini*, sect. *Calamovilfa* [50]. The WGD1 event identified in sect. *Spartina*, estimated at 12.6–29.0 Mya, postdated the divergence between the *Sporobolus* and *Spartina* sections and may potentially be shared with more closely related *Sporobolus* species.

In the sect. *Spartina*, chromosome numbers range from  $2n=4x=40$  to  $2n=124$  [56], suggesting that it likely evolved from a tetraploid ancestor. Variable chromosome number is observed in the sect. *Clandestini*: *Sporobolus neglectus* and *S. clandestinus* with  $2n=36$  [87–89]; *S. vaginiflorus* with  $2n=54$  [90]; *S. compositus* with  $2n=54$ – $108$  [87,91]. This may

reflect historical chromosomal rearrangements and shifts in basic number from 10 to 6 or 9, possibly mirroring those observed in sect. *Spartina*. The sect. *Calamovilfa*, which diverged 12–20 Mya from sect. *Spartina*, as indicated from chloroplast genome data [51], is divided into two subsections. In the subsect. *Calamovilfa*, chromosome counts of  $2n=40$ , 60 have been observed in *Calamovilfa longifolia* [92,93] and *C. gigantea* [93,94], while in the subsect. *Floridani*,  $2n=72$  and  $2n=30$  chromosomes were reported in *Sporobolus heterolepis* [88,95] and *S. interruptus* [96], respectively. This suggests that the ancestor of the sect. *Calamovilfa* kept a basic chromosome number of 10, which evolved differently in the two subsections. These patterns warrant targeted comparative genomics to confirm whether WGD1 is shared across sister sections such as *Clandestini* and *Calamovilfa*.

### Ancestral grass genome evolution in *Sporobolus*

The comparative analysis of the *S. maritimus* ( $2n=60$ ) and *S. alterniflorus* ( $2n=62$ ) genomes revealed the chromosome rearrangements responsible for their chromosome number difference [48]. The present study provides evidence that the segment of chromosome 15, now inserted into the center of *S. alterniflorus* chromosome 4, shares homology with the ancestral grass chromosome 12 (in dark blue, Fig 4). Additionally, *S. alterniflorus* chromosome 31, which originated from a segment of chromosome 4, is homologous to the ancestral chromosome 11 (in light blue, Fig 4). This chromosomal rearrangement occurred after all reported WGD events and led to speciation between *S. maritimus* and *S. alterniflorus* that diverged 3.7–7.7 Mya.

Although *S. maritimus* and *S. alterniflorus* were previously regarded as hexaploids ( $2n=6x=60$ ; considering a basic chromosome number  $x=10$  [56]), synteny with diploid and tetraploid grasses reveals a 1:4 and 2:4 homology ratio, respectively, suggesting an octoploid origin followed by diploidization. Chromosome restructuring reduced the basic number from  $n=20$  to  $n=15$  prior to a subsequent WGD (WGD2), supporting their classification as diploidized meso-octoploids [48].

We found that several *S. maritimus* scaffolds and *S. alterniflorus* chromosomes showed homology and synteny with multiple chromosomes of the same Poaceae species, revealing a total of seven nested chromosome insertions (NCI) and one translocation in the evolutionary history of this genome prior WGD2.

Two NCI events (A2-A10-A2 and A6-A9-A6) are discernable when comparing the sect. *Spartina* genomes with genomes outside the Chloridoideae subfamily (*O. sativa* and *S. bicolor*). These fusion events likely occurred in the Chloridoideae ancestor, as these rearrangements are observed in all four copies of the sect. *Spartina* genomes and are shared among the various Chloridoideae genomes examined in this study. Our findings are consistent with previous studies that found a chromosome number reduction from 12 to 10 in the ancestor of Chloridoideae, following these same two chromosomal fusion events [42,44,46].

The remaining five NCIs (A3-A5-A3; A3-A11-A3; A8-A11-A8; A7-A12-A7; A2-A10-A12-A10-A2) observed in only two of four sect. *Spartina* genome copies likely occurred after WGD1 but before WGD2, reshaping the genome and reducing the base chromosome number from 20 to 15 (descending dysploidy). This new odd basic chromosome number ( $x=15$ ) would have been fertile in a  $2n=30$  plant but has never been recorded in natural populations. The strong similarity and karyotype structure between duplicated copies from WGD2 (copies 1 and 2) would suggest auto-polyploidy or allo-polyploidy between slightly divergent parental genomes for this polyploidization event, which led to an ancestral genome with  $2n=4x=60$ , and confirms that the reported chromosomal restructurations were rapidly followed by WGD2 [48]. The modern tetraploid *S. maritimus* genome is still displaying  $2n=4x=60$  chromosomes, while the *S. alterniflorus* genome was affected by a new restructuration leading to  $2n=4x=62$  chromosomes.

This study sheds light on the importance of NCIs in the diploidization process affecting polyploid genome evolution. NCIs result from fusion between two non-homologous chromosomes by the insertion of one chromosome between the arms of the second one [97]. This descending dysploidy mechanism requires at least three double strand-breaks and that the inserted chromosome centromere remains functional [98]. Several studies have highlighted that NCIs are considered

as important mechanisms in the grass family, with reported events in Pooideae (*Aegilops tauschii* [35], *Brachypodium distachyon* [99], *Secale cereale* [100]), Panicoideae (*Setaria italica* [101], *Zea mays* [102], *Eremochloa ophiuroides* [103], *Saccharum* complex [104]) and Chloridoideae (*Zoysia japonica* [46], *Cynodon dactylon* [42], *Cynodon transvaalensis* [43], *Eleusine coracana* [44]). Although the mechanisms enabling NCI are still poorly understood, these types of chromosomal rearrangements are common in grasses, strongly suggesting that grass chromosomes possess some intrinsic genomic characteristics that predispose them to NCI [97].

In this study, we identified that the ancestral chromosome 12 (A12) is involved in two NCIs (A2-A10-A12-A10-A2 and A7-A12-A7), as well as in the chromosomal rearrangement that led to the extra-chromosome pair in *S. alterniflorus*. Other studies have highlighted NCIs involving the A12 as the inserted chromosome in *Eleusine coracana* (A5-A12-A5) [44] and in *Cynodon transvaalensis* (A1-A12-A1) [43]. Chromosome 12 appears also involved in chromosomal rearrangement in *Cynodon dactylon* [42] and in a translocation with A6 in *Oropetium thomaeum* [45]. The frequent involvement of ancestral chromosomes 12 in NCIs across Chloridoideae lineages, including multiple events identified in this study, suggests a possible structural or sequence predisposition. Investigating the genomic architecture of A12 could unveil novel mechanisms governing chromosome fusion dynamics in grasses.

This study reconstructs the complex history of polyploidization and chromosomal rearrangement in the *Sporobolus* sect. *Spartina*. We confirm two major WGD events (WGD1 and WGD2), separated by a suite of chromosomal rearrangements, including one translocation and five lineage-specific NCIs, which reduced the base chromosome number from  $n=20$  to  $n=15$ . These structural innovations culminated in the extant karyotypes of *S. maritimus* ( $2n=60$ ) and *S. alterniflorus* ( $2n=62$ ). Our findings reinforce the importance of NCIs as drivers of descending dysploidy and genome plasticity in grasses. They offer new perspectives for understanding the chromatinian context of genomic regions subject to NCIs. Our results also pave the way for future studies regarding the functional consequences of genome restructuring and fractionation and their adaptive consequences in these ecologically important but still understudied grass species.

## Supporting information

**S1 Fig. Workflow used for genome analyses and comparisons.** This consists of four main steps: (1) detection of homologous sequences using a Reciprocal Blast Hit approach or the OrthoFinder2 tool; (2) estimations of gene pair divergence times by calculating synonymous substitution rates; (3) identification of syntenic blocks; and (4) karyotype reconstruction. (TIFF)

**S2 Fig. Effect of parameter stringency on the detection of syntenic blocks.** Dotplot comparisons between *Sporobolus maritimus* and *Oryza sativa* using different synteny search settings. Syntenic blocks are defined as following:  $\geq 5$  orthologous gene pairs, and intervening genes between syntenic pairs (**A**)  $\leq 100$  (as presented in Fig 3A), (**B**)  $\leq 20$ . (**C**) Table summarizing the detected number of CDS in both species and the number of syntenic gene pairs under three settings. *S. maritimus* scaffolds are ordered as following in all dotplots: 3, 21, 16, 9, 15, 45, 50, 58, 65, 1, 2, 7, 12, 26, 20, 22, 64, 14, 19, 4, 56, 60, 43, 40, 49, 18, 10, 39, 23, 37, 57, 59, 46, 51, 44, 47, 53, 29, 52, 24, 8, 36, 25, 5, 41, 30, 62, 38, 54, 48, 17, 63, 27, 55, 42, 32, 35, 34, 28, 6, 11, 61, 13, 66, 33, 31, 67, 68, 69. (TIFF)

**S3 Fig. Venn diagram representing the number of orthogroups shared among analyzed genomes.** (TIFF)

**S4 Fig. Distribution of the estimated synonymous substitution (Ks) rates between *S. alterniflorus* and the selected Poaceae genomes.** The divergence time of each peak (based on the mode estimated using the R package *mixtools*) is presented on the Ks distribution. (TIFF)

**S5 Fig. Graphical representations of homologous genes and conserved syntenic blocks.** Dotplot comparisons between *Sporobolus maritimus* and (A) *Sorghum bicolor* (N=21,779), (B) *Oropetium thomaeum* (N=29,876), (C) *Zoysia japonica* (N=36,660), (D) *Sporobolus stapfianus* (N=6,654), (E) *Sporobolus pyramidalis* (N=26,737). Dots are colored in black when Ks values are within the following ranges: 0.407–0.653 (A), 0.253–0.400 (B), 0.218–0.364 (C), 0.196–0.338 (D), 0.193–0.333 (E). All others dots are in grey.

(TIFF)

**S1 Table. Chromosome number, ploidy level, genome size and repeat content estimations for the species analyzed for Reciprocal Blast Hits and synteny searches.**

(DOCX)

## Acknowledgments

This work was conducted in the framework of a collaborative project (Interuniversity Convention) between the University of Rennes (France) and the Fudan University of Shanghai (China). The French contributors gratefully acknowledge funding from UMR 6553 Ecology, Biodiversity and Evolution (Ecobio – University of Rennes – CNRS), including a doctoral grant to M. Milin by the University of Rennes. Additional support was received from the CNRS – University of Rennes – funded International Research Network (IRN) Polyploidy and Biodiversity (POLYDIV). The Chinese team was supported by the National Key Research and Development Program of China and the National Natural Science Foundation of China. The authors acknowledge two reviewers for their contribution. The funders had no role in study design, data collection and analysis, decision to publish, or preparation of the manuscript.

## Author contributions

**Conceptualization:** Morgane Milin, Malika Ainouche, Armel Salmon.

**Data curation:** Morgane Milin, Marc Beringer, Christian Parisod, Armel Salmon.

**Formal analysis:** Morgane Milin, Christian Parisod, Malika Ainouche, Armel Salmon.

**Funding acquisition:** Lin-Feng Li, Bo Li, Malika Ainouche, Armel Salmon.

**Investigation:** Oscar Lima, Lin-Feng Li, Bo Li, Malika Ainouche, Armel Salmon.

**Methodology:** Morgane Milin, Lin-Feng Li, Marc Beringer, Christian Parisod, Armel Salmon.

**Project administration:** Malika Ainouche, Armel Salmon.

**Resources:** Oscar Lima, Lin-Feng Li, Bo Li, Malika Ainouche.

**Software:** Morgane Milin.

## References

1. Wendel JF, Jackson SA, Meyers BC, Wing RA. Evolution of plant genome architecture. *Genome Biol.* 2016;17:37. <https://doi.org/10.1186/s13059-016-0908-1> PMID: 26926526
2. Soltis PS, Marchant DB, Van de Peer Y, Soltis DE. Polyploidy and genome evolution in plants. *Curr Opin Genet Dev.* 2015;35:119–25. <https://doi.org/10.1016/j.gde.2015.11.003> PMID: 26656231
3. Stebbins GL. *Variation and Evolution in Plants.* New York, Chichester, West Sussex: Columbia University Press. 1950.
4. Lewis WH. *Polyploidy: Biological Relevance.* New York, USA: Plenum Press. 1980.
5. Soltis D, Soltis P. Polyploidy: recurrent formation and genome evolution. *Trends Ecol Evol.* 1999;14(9):348–52. [https://doi.org/10.1016/s0169-5347\(99\)01638-9](https://doi.org/10.1016/s0169-5347(99)01638-9) PMID: 10441308
6. Li Z, McKibben MTW, Finch GS, Blischak PD, Sutherland BL, Barker MS. Patterns and processes of diploidization in land plants. *Annu Rev Plant Biol.* 2021;72:387–410. <https://doi.org/10.1146/annurev-arplant-050718-100344> PMID: 33684297

7. Freeling M. Bias in plant gene content following different sorts of duplication: Tandem, whole-genome, segmental, or by transposition. *Annu Rev Plant Biol.* 2009;60:433–53. <https://doi.org/10.1146/annurev.arplant.043008.092122> PMID: [19575588](https://pubmed.ncbi.nlm.nih.gov/19575588/)
8. Schnable JC, Springer NM, Freeling M. Differentiation of the maize subgenomes by genome dominance and both ancient and ongoing gene loss. *Proc Natl Acad Sci U S A.* 2011;108(10):4069–74. <https://doi.org/10.1073/pnas.1101368108> PMID: [21368132](https://pubmed.ncbi.nlm.nih.gov/21368132/)
9. Cheng F, Wu J, Cai X, Liang J, Freeling M, Wang X. Gene retention, fractionation and subgenome differences in polyploid plants. *Nat Plants.* 2018;4(5):258–68. <https://doi.org/10.1038/s41477-018-0136-7> PMID: [29725103](https://pubmed.ncbi.nlm.nih.gov/29725103/)
10. Mandáková T, Lysak MA. Post-polyploid diploidization and diversification through dysploid changes. *Curr Opin Plant Biol.* 2018;42:55–65. <https://doi.org/10.1016/j.pbi.2018.03.001> PMID: [29567623](https://pubmed.ncbi.nlm.nih.gov/29567623/)
11. Leitch IJ, Bennett MD. Genome downsizing in polyploid plants. *Biol J Linn Soc.* 2004;82(4):651–63.
12. Wang X, Morton JA, Pellicer J, Leitch IJ, Leitch AR. Genome downsizing after polyploidy: mechanisms, rates and selection pressures. *Plant J.* 2021;107(4):1003–15. <https://doi.org/10.1111/tbj.15363> PMID: [34077584](https://pubmed.ncbi.nlm.nih.gov/34077584/)
13. Tkach N, Winterfeld G, Röser M. Genome sizes of grasses (Poaceae), chromosomal evolution, paleogenomics and the ancestral grass karyotype (AGK). *Plant Syst Evol.* 2025;311(1). <https://doi.org/10.1007/s00606-024-01934-x>
14. Wendel JF. The wondrous cycles of polyploidy in plants. *Am J Bot.* 2015;102(11):1753–6. <https://doi.org/10.3732/ajb.1500320> PMID: [26451037](https://pubmed.ncbi.nlm.nih.gov/26451037/)
15. Van de Peer Y, Mizrahi E, Marchal K. The evolutionary significance of polyploidy. *Nat Rev Genet.* 2017;18(7):411–24. <https://doi.org/10.1038/nrg.2017.26> PMID: [28502977](https://pubmed.ncbi.nlm.nih.gov/28502977/)
16. Wendel JF, Doyle JJ. Polyploidy and evolution in plants. Henry RJ. Plant diversity and evolution: Genotypic and phenotypic variation in higher plants. Wallingford, UK: CABI. 2005.
17. Chen ZJ. Genetic and epigenetic mechanisms for gene expression and phenotypic variation in plant polyploids. *Annu Rev Plant Biol.* 2007;58:377–406. <https://doi.org/10.1146/annurev.arplant.58.032806.103835> PMID: [17280525](https://pubmed.ncbi.nlm.nih.gov/17280525/)
18. Otto SP. The evolutionary consequences of polyploidy. *Cell.* 2007;131(3):452–62.
19. Tayalé A, Parisod C. Natural pathways to polyploidy in plants and consequences for genome reorganization. *Cytogenet Genome Res.* 2013;140(2–4):79–96. <https://doi.org/10.1159/000351318> PMID: [23751271](https://pubmed.ncbi.nlm.nih.gov/23751271/)
20. Alix K, Gérard PR, Schwarzacher T, Heslop-Harrison JSP. Polyploidy and interspecific hybridization: partners for adaptation, speciation and evolution in plants. *Ann Bot.* 2017;120(2):183–94. <https://doi.org/10.1093/aob/mcx079> PMID: [28854567](https://pubmed.ncbi.nlm.nih.gov/28854567/)
21. Van de Peer Y, Ashman T-L, Soltis PS, Soltis DE. Polyploidy: An evolutionary and ecological force in stressful times. *Plant Cell.* 2021;33(1):11–26. <https://doi.org/10.1093/plcell/koaa015> PMID: [33751096](https://pubmed.ncbi.nlm.nih.gov/33751096/)
22. Stebbins G. Chromosomal evolution in higher plants. London: Edward Arnold Ltd. 1971.
23. Masterson J. Stomatal size in fossil plants: Evidence for polyploidy in majority of angiosperms. *Science.* 1994;264(5157):421–4. <https://doi.org/10.1126/science.264.5157.421> PMID: [17836906](https://pubmed.ncbi.nlm.nih.gov/17836906/)
24. Wang X, Wang J, Jin D, Guo H, Lee T-H, Liu T, et al. Genome alignment spanning major poaceae lineages reveals heterogeneous evolutionary rates and alters inferred dates for key evolutionary events. *Mol Plant.* 2015;8(6):885–98. <https://doi.org/10.1016/j.molp.2015.04.004> PMID: [25896453](https://pubmed.ncbi.nlm.nih.gov/25896453/)
25. Ma P-F, Liu Y-L, Jin G-H, Liu J-X, Wu H, He J, et al. The *Pharus latifolius* genome bridges the gap of early grass evolution. *Plant Cell.* 2021;33(4):846–64. <https://doi.org/10.1093/plcell/koab015> PMID: [33630094](https://pubmed.ncbi.nlm.nih.gov/33630094/)
26. Zou C, Li L, Miki D, Li D, Tang Q, Xiao L, et al. The genome of broomcorn millet. *Nat Commun.* 2019;10(1):436. <https://doi.org/10.1038/s41467-019-08409-5> PMID: [30683860](https://pubmed.ncbi.nlm.nih.gov/30683860/)
27. Bellec A, Sow MD, Pont C, Civan P, Mardoc E, Duchemin W, et al. Tracing 100 million years of grass genome evolutionary plasticity. *Plant J.* 2023;114(6):1243–66. <https://doi.org/10.1111/tbj.16185> PMID: [36919199](https://pubmed.ncbi.nlm.nih.gov/36919199/)
28. Murat F, Armero A, Pont C, Klopp C, Salse J. Reconstructing the genome of the most recent common ancestor of flowering plants. *Nat Genet.* 2017;49(4):490–6. <https://doi.org/10.1038/ng.3813> PMID: [28288112](https://pubmed.ncbi.nlm.nih.gov/28288112/)
29. Salse J, Abrouk M, Murat F, Quraishi UM, Feuillet C. Improved criteria and comparative genomics tool provide new insights into grass paleogenomics. *Brief Bioinform.* 2009;10(6):619–30. <https://doi.org/10.1093/bib/bbp037> PMID: [19720678](https://pubmed.ncbi.nlm.nih.gov/19720678/)
30. Batiru G, Lübberstedt T. Polyploidy in maize: from evolution to breeding. *Theor Appl Genet.* 2024;137(8):182. <https://doi.org/10.1007/s00122-024-04688-9> PMID: [39001883](https://pubmed.ncbi.nlm.nih.gov/39001883/)
31. Swigoňová Z, Lai J, Ma J, Ramakrishna W, Llaca V, Bennetzen JL. Close split of sorghum and maize genome progenitors. *Genome Research.* 2004;14(10a):1916–23.
32. Schnable PS, Ware D, Fulton RS, Stein JC, Wei F, Pasternak S, et al. The B73 maize genome: complexity, diversity, and dynamics. *Science.* 2009;326(5956):1112–5. <https://doi.org/10.1126/science.1178534> PMID: [19965430](https://pubmed.ncbi.nlm.nih.gov/19965430/)
33. Piperidis N, D'Hont A. Sugarcane genome architecture decrypted with chromosome-specific oligo probes. *Plant J.* 2020;103(6):2039–51. <https://doi.org/10.1111/tbj.14881> PMID: [32537783](https://pubmed.ncbi.nlm.nih.gov/32537783/)
34. Dvorak J, Wang L, Zhu T, Jorgensen CM, Deal KR, Dai X, et al. Structural variation and rates of genome evolution in the grass family seen through comparison of sequences of genomes greatly differing in size. *Plant J.* 2018;95(3):487–503. <https://doi.org/10.1111/tbj.13964> PMID: [29770515](https://pubmed.ncbi.nlm.nih.gov/29770515/)

35. Luo MC, Deal KR, Akhunov ED, Akhunova AR, Anderson OD, Anderson JA, et al. Genome comparisons reveal a dominant mechanism of chromosome number reduction in grasses and accelerated genome evolution in Triticeae. *Proc Natl Acad Sci U S A*. 2009;106(37):15780–5. <https://doi.org/10.1073/pnas.0908195106> PMID: 19717446
36. Marcussen T, Sandve SR, Heier L, Spannagl M, Pfeifer M, International Wheat Genome Sequencing Consortium, et al. Ancient hybridizations among the ancestral genomes of bread wheat. *Science*. 2014;345(6194):1250092. <https://doi.org/10.1126/science.1250092> PMID: 25035499
37. Soreng RJ, Peterson PM, Zuloaga FO, Romaschenko K, Clark LG, Teisher JK. A worldwide phylogenetic classification of the Poaceae (Gramineae) III: An update. *J Syst Evol*. 2022;60(3):476–521.
38. Roodt R, Spies JJ. Chromosome studies in the grass subfamily Chloridoideae. I. Basic chromosome numbers. *TAXON*. 2003;52(3):557–83. <https://doi.org/10.2307/3647454>
39. Roodt R, Spies JJ. Chromosome Studies in the Grass Subfamily Chloridoideae. II. An Analysis of Polyploidy. *Taxon*. 2003;52(4):736. <https://doi.org/10.2307/3647348>
40. Carballo J, Santos BACM, Zappacosta D, Garbus I, Selva JP, Gallo CA, et al. A high-quality genome of *Eragrostis curvula* grass provides insights into Poaceae evolution and supports new strategies to enhance forage quality. *Sci Rep*. 2019;9(1):10250. <https://doi.org/10.1038/s41598-019-46610-0> PMID: 31308395
41. VanBuren R, Man Wai C, Wang X, Pardo J, Yocca AE, Wang H, et al. Exceptional subgenome stability and functional divergence in the allotetraploid Ethiopian cereal teff. *Nat Commun*. 2020;11(1):884. <https://doi.org/10.1038/s41467-020-14724-z> PMID: 32060277
42. Fang T, Dong H, Yu S, Moss JQ, Fontanier CH, Martin DL, et al. Sequence-based genetic mapping of *Cynodon dactylon* Pers. reveals new insights into genome evolution in Poaceae. *Commun Biol*. 2020;3(1):358. <https://doi.org/10.1038/s42003-020-1086-y> PMID: 32647329
43. Cui F, Taier G, Li M, Dai X, Hang N, Zhang X, et al. The genome of the warm-season turfgrass African bermudagrass (*Cynodon transvaalensis*). *Hortic Res*. 2021;8(1):93. <https://doi.org/10.1038/s41438-021-00519-w> PMID: 33931599
44. Devos KM, Qi P, Bahri BA, Gimode DM, Jenike K, Manthi SJ, et al. Genome analyses reveal population structure and a purple stigma color gene candidate in finger millet. *Nat Commun*. 2023;14(1):3694. <https://doi.org/10.1038/s41467-023-38915-6> PMID: 37344528
45. VanBuren R, Wai CM, Keilwagen J, Pardo J. A chromosome-scale assembly of the model desiccation tolerant grass *Oropetium thomaeum*. *Plant Direct*. 2018;2(11):e00096. <https://doi.org/10.1002/pld3.96> PMID: 31245697
46. Wang F, Singh R, Genovesi AD, Wai CM, Huang X, Chandra A, et al. Sequence-tagged high-density genetic maps of *Zoysia japonica* provide insights into genome evolution in Chloridoideae. *Plant J*. 2015;82(5):744–57. <https://doi.org/10.1111/tjp.12842> PMID: 25846381
47. Hao Y, Wang X-F, Guo Y, Li T-Y, Yang J, Ainouche ML, et al. Genomic and phenotypic signatures provide insights into the wide adaptation of a global plant invader. *Plant Commun*. 2024;5(4):100820. <https://doi.org/10.1016/j.xplc.2024.100820> PMID: 38221758
48. Salmon A, Hao Y, Milin M, Lima O, Cavé-Radet A, Giraud D, et al. On the way to diploidization and unexpected ploidy in the grass *Sporobolus* section *Spartina* mesopolyploids. *Nat Commun*. 2025;16(1):1997. <https://doi.org/10.1038/s41467-025-56983-8> PMID: 40011479
49. Chávez Montes RA, Haber A, Pardo J, Powell RF, Divisetty UK, Silva AT, et al. A comparative genomics examination of desiccation tolerance and sensitivity in two sister grass species. *Proc Natl Acad Sci U S A*. 2022;119(5):e2118886119. <https://doi.org/10.1073/pnas.2118886119> PMID: 35082155
50. Peterson PM, Romaschenko K, Arrieta YH, Saarela JM. A molecular phylogeny and new subgeneric classification of *Sporobolus* (Poaceae: Chloridoideae: Sporobolinae). *TAXON*. 2014;63(6):1212–43. <https://doi.org/10.12705/636.19>
51. Rousseau-Gueutin M, Bellot S, Martin GE, Boutte J, Chelaifa H, Lima O, et al. The chloroplast genome of the hexaploid *Spartina maritima* (Poaceae, Chloridoideae): Comparative analyses and molecular dating. *Mol Phylogenet Evol*. 2015;93:5–16. <https://doi.org/10.1016/j.ympev.2015.06.013> PMID: 26182838
52. Bortolus A, Adam P, Adams JB, Ainouche ML, Ayres D, Bertness MD, et al. Supporting *Spartina*: Interdisciplinary perspective shows *Spartina* as a distinct solid genus. *Ecology*. 2019;100(11):e02863. <https://doi.org/10.1002/ecy.2863> PMID: 31398280
53. Chung CH. Forty years of ecological engineering with *Spartina* plantations in China. *Ecol Eng*. 2006;27(1):49–57.
54. Balke T, Klaassen PC, Garbutt A, van der Wal D, Herman PMJ, Bouma TJ. Conditional outcome of ecosystem engineering: A case study on tussocks of the salt marsh pioneer *Spartina anglica*. *Geomorphology*. 2012;153–154:232–8. <https://doi.org/10.1016/j.geomorph.2012.03.002>
55. Marchant CJ. Corrected Chromosome Numbers for *Spartina* × *townsendii* and its Parent Species. *Nature*. 1963;199(4896):929–929. <https://doi.org/10.1038/199929a0>
56. Marchant CJ. Evolution in *Spartina* (Gramineae): III. Species chromosome numbers and their taxonomic significance. *J Linn Soc Lond Bot*. 1968;60(383):411–7.
57. Ainouche ML, Baumel A, Salmon A. *Spartina anglica* C. E. Hubbard: A natural model system for analysing early evolutionary changes that affect allopolyploid genomes: Evolution of *Spartina anglica*. *Biol J Linn Soc*. 2004;82(4):475–84.
58. Fortune PM, Schierenbeck KA, Ainouche AK, Jacquemin J, Wendel JF, Ainouche ML. Evolutionary dynamics of *Waxy* and the origin of hexaploid *Spartina* species (Poaceae). *Mol Phylogenet Evol*. 2007;43(3):1040–55. <https://doi.org/10.1016/j.ympev.2006.11.018> PMID: 17208463
59. Boutte J, Ferreira de Carvalho J, Rousseau-Gueutin M, Poulain J, Da Silva C, Wincker P, et al. Reference transcriptomes and detection of duplicated copies in hexaploid and allododecaploid *Spartina* species (Poaceae). *Genome Biol Evol*. 2016;8(9):3030–44. <https://doi.org/10.1093/gbe/evw209> PMID: 27614235

60. Gallaher TJ, Peterson PM, Soreng RJ, Zuloaga FO, Li D, Clark LG. Grasses through space and time: An overview of the biogeographical and macroevolutionary history of Poaceae. *J Syst Evol.* 2022;60(3):522–69.
61. Tanaka H, Hirakawa H, Kosugi S, Nakayama S, Ono A, Watanabe A, et al. Sequencing and comparative analyses of the genomes of zoysiagrasses. *DNA Res.* 2016;23(2):171–80. <https://doi.org/10.1093/dnares/dsw006> PMID: 26975196
62. McCormick RF, Truong SK, Sreedasyam A, Jenkins J, Shu S, Sims D, et al. The Sorghum bicolor reference genome: improved assembly, gene annotations, a transcriptome atlas, and signatures of genome organization. *Plant J.* 2018;93(2):338–54. <https://doi.org/10.1111/tpj.13781> PMID: 29161754
63. Kawahara Y, de la Bastide M, Hamilton JP, Kanamori H, McCombie WR, Ouyang S, et al. Improvement of the Oryza sativa Nipponbare reference genome using next generation sequence and optical map data. *Rice (N Y).* 2013;6(1):4. <https://doi.org/10.1186/1939-8433-6-4> PMID: 24280374
64. Emms DM, Kelly S. OrthoFinder: Phylogenetic orthology inference for comparative genomics. *Genome Biol.* 2019;20(1):238. <https://doi.org/10.1186/s13059-019-1832-y> PMID: 31727128
65. Bennetzen JL, Schmutz J, Wang H, Percifield R, Hawkins J, Pontaroli AC, et al. Reference genome sequence of the model plant Setaria. *Nat Biotechnol.* 2012;30(6):555–61. <https://doi.org/10.1038/nbt.2196> PMID: 22580951
66. International Brachypodium Initiative. Genome sequencing and analysis of the model grass Brachypodium distachyon. *Nature.* 2010;463(7282):763–8. <https://doi.org/10.1038/nature08747> PMID: 20148030
67. Dalquen DA, Dessimoz C. Bidirectional best hits miss many orthologs in duplication-rich clades such as plants and animals. *Genome Biol Evol.* 2013;5(10):1800–6. <https://doi.org/10.1093/gbe/evt132> PMID: 24013106
68. Altschul SF. BLAST Algorithm. 1st ed. Wiley. 2014.
69. Miliin M. WGD\_Tracker (v1.0). <https://doi.org/10.5281/zenodo.14672010>. 2025.
70. Ranwez V, Harispe S, Delsuc F, Douzery EJP. MACSE: Multiple Alignment of Coding SEquences accounting for frameshifts and stop codons. *PLoS One.* 2011;6(9):e22594. <https://doi.org/10.1371/journal.pone.0022594> PMID: 21949676
71. Ranwez V, Douzery EJP, Cambon C, Chantret N, Delsuc F. MACSE v2: Toolkit for the Alignment of Coding Sequences Accounting for Frameshifts and Stop Codons. *Mol Biol Evol.* 2018;35(10):2582–4. <https://doi.org/10.1093/molbev/msy159> PMID: 30165589
72. Nei M, Gojobori T. Simple methods for estimating the numbers of synonymous and nonsynonymous nucleotide substitutions. *Mol Biol Evol.* 1986;3(5):418–26. <https://doi.org/10.1093/oxfordjournals.molbev.a040410> PMID: 3444411
73. Yang Z. PAML 4: phylogenetic analysis by maximum likelihood. *Mol Biol Evol.* 2007;24(8):1586–91. <https://doi.org/10.1093/molbev/msm088> PMID: 17483113
74. Benaglia T, Chauveau D, Hunter DR, Young D. Mixtools: An R Package for Analyzing Finite Mixture Models. *J Stat Softw.* 2009;32(6):1–29.
75. Gaut BS, Morton BR, McCaig BC, Clegg MT. Substitution rate comparisons between grasses and palms: synonymous rate differences at the nuclear gene Adh parallel rate differences at the plastid gene rbcL. *Proc Natl Acad Sci U S A.* 1996;93(19):10274–9. <https://doi.org/10.1073/pnas.93.19.10274> PMID: 8816790
76. Blanc G, Wolfe KH. Widespread paleopolyploidy in model plant species inferred from age distributions of duplicate genes. *Plant Cell.* 2004;16(7):1667–78. <https://doi.org/10.1105/tpc.021345> PMID: 15208399
77. Paterson AH, Bowers JE, Chapman BA. Ancient polyploidization predating divergence of the cereals, and its consequences for comparative genomics. *Proc Natl Acad Sci U S A.* 2004;101(26):9903–8. <https://doi.org/10.1073/pnas.0307901101> PMID: 15161969
78. Wu D, Shen E, Jiang B, Feng Y, Tang W, Lao S, et al. Genomic insights into the evolution of Echinochloa species as weed and orphan crop. *Nat Commun.* 2022;13(1):689. <https://doi.org/10.1038/s41467-022-28359-9> PMID: 35115514
79. Wang W, Li X, Fan S, He Y, Wei M, Wang J, et al. Combined genomic and transcriptomic analysis reveals the contribution of tandem duplication genes to low-temperature adaptation in perennial ryegrass. *Front Plant Sci.* 2023;14:1216048. <https://doi.org/10.3389/fpls.2023.1216048> PMID: 37502702
80. Wang H, Fang T, Li X, Xie Y, Wang W, Hu T, et al. Whole-genome sequencing of allotetraploid bermudagrass reveals the origin of Cynodon and candidate genes for salt tolerance. *Plant J.* 2024;118(6):2068–84. <https://doi.org/10.1111/tpj.16729> PMID: 38531629
81. Tang H, Krishnakumar V, Li J. jvci: JCVI utility libraries (v0.5.7). <https://doi.org/10.5281/zenodo.31631>. 2015.
82. Murat F, Xu J-H, Tannier E, Abrouk M, Guilhot N, Pont C, et al. Ancestral grass karyotype reconstruction unravels new mechanisms of genome shuffling as a source of plant evolution. *Genome Res.* 2010;20(11):1545–57. <https://doi.org/10.1101/gr.109744.110> PMID: 20876790
83. Doyle JJ, Egan AN. Dating the origins of polyploidy events. *New Phytol.* 2010;186(1):73–85. <https://doi.org/10.1111/j.1469-8137.2009.03118.x> PMID: 20028472
84. Wang W, Shao A, Xu X, Fan S, Fu J. Comparative genomics reveals the molecular mechanism of salt adaptation for zoysiagrasses. *BMC Plant Biol.* 2022;22(1):355. <https://doi.org/10.1186/s12870-022-03752-0> PMID: 35864464
85. Prasad V, Strömberg CAE, Leaché AD, Samant B, Patnaik R, Tang L, et al. Late Cretaceous origin of the rice tribe provides evidence for early diversification in Poaceae. *Nat Commun.* 2011;2:480. <https://doi.org/10.1038/ncomms1482> PMID: 21934664
86. Christin P-A, Spriggs E, Osborne CP, Strömberg CAE, Salamin N, Edwards EJ. Molecular dating, evolutionary rates, and the age of the grasses. *Syst Biol.* 2014;63(2):153–65. <https://doi.org/10.1093/sysbio/syt072> PMID: 24287097

87. Brown WV. A Cytological Study of Some Texas Gramineae. *Bulletin of the Torrey Botanical Club*. 1950;77(2):63. <https://doi.org/10.2307/2482267>
88. Löve Á. Chromosome number reports LXXI. *Taxon*. 1981;30(2):506–17.
89. Holmgren NH, Goldblatt P. Index to Plant Chromosome Numbers 1975–1978. *Brittonia*. 1981;33(4):598. <https://doi.org/10.2307/2806772>
90. Gould FW. Chromosome numbers in southwestern grasses. *Am J Bot*. 1960;47(10):873–7.
91. Gould FW. Chromosome numbers of Texas grasses. *Can J Bot*. 1968;46(10):1315–25.
92. Reeder JR, Ellington MA. *Calamovilfa*, a Misplaced Genus of Gramineae. *Brittonia*. 1960;12(1):71. <https://doi.org/10.2307/2805335>
93. Reeder JR, Singh DN. Chromosome Number in *Calamovilfa*. *Bulletin of the Torrey Botanical Club*. 1967;94(3):199. <https://doi.org/10.2307/2484051>
94. Thieret JW. Synopsis of the genus *Calamovilfa* (Gramineae). *South Appalach Bot Soc*. 1966;31(2):145–52.
95. Nielsen EL. Grass studies. III. Additional somatic chromosome complements. *Am J Bot*. 1939;26(6):366–72.
96. Reeder JR. Chromosome numbers in western grasses. *Am J Bot*. 1977;64(1):102–10.
97. Lysak MA. Celebrating Mendel, McClintock, and Darlington: On end-to-end chromosome fusions and nested chromosome fusions. *Plant Cell*. 2022;34(7):2475–91. <https://doi.org/10.1093/plcell/koac116> PMID: 35441689
98. Schubert I, Lysak MA. Interpretation of karyotype evolution should consider chromosome structural constraints. *Trends Genet*. 2011;27(6):207–16. <https://doi.org/10.1016/j.tig.2011.03.004> PMID: 21592609
99. Lusinska J, Betekhtin A, Lopez-Alvarez D, Catalan P, Jenkins G, Wolny E, et al. Comparatively barcoded chromosomes of brachypodium perennials tell the story of their karyotype structure and evolution. *Int J Mol Sci*. 2019;20(22):5557. <https://doi.org/10.3390/ijms20225557> PMID: 31703351
100. Li G, Wang L, Yang J, He H, Jin H, Li X, et al. A high-quality genome assembly highlights rye genomic characteristics and agronomically important genes. *Nat Genet*. 2021;53(4):574–84. <https://doi.org/10.1038/s41588-021-00808-z> PMID: 33737755
101. Zhang G, Liu X, Quan Z, Cheng S, Xu X, Pan S, et al. Genome sequence of foxtail millet (*Setaria italica*) provides insights into grass evolution and biofuel potential. *Nat Biotechnol*. 2012;30(6):549–54. <https://doi.org/10.1038/nbt.2195> PMID: 22580950
102. Wang H, Bennetzen JL. Centromere retention and loss during the descent of maize from a tetraploid ancestor. *Proc Natl Acad Sci U S A*. 2012;109(51):21004–9. <https://doi.org/10.1073/pnas.1218668109> PMID: 23197827
103. Wang J, Zi H, Wang R, Liu J, Wang H, Chen R, et al. A high-quality chromosome-scale assembly of the centipedegrass [*Eremochloa ophiuroides* (Munro) Hack.] genome provides insights into chromosomal structural evolution and prostrate growth habit. *Hortic Res*. 2021;8(1):201. <https://doi.org/10.1038/s41438-021-00636-6> PMID: 34465733
104. Yu F, Zhao X, Chai J, Ding X, Li X, Huang Y, et al. Chromosome-specific painting unveils chromosomal fusions and distinct allopolyploid species in the *Saccharum* complex. *New Phytol*. 2022;233(4):1953–65. <https://doi.org/10.1111/nph.17905> PMID: 34874076
